# Supplementary material for: Metabolic engineering of riboflavin production in Ashbya gossypii through pathway optimization
Source: PubMed Central journal article supplement (PMC4605130; doi:10.1186/s12934-015-0354-x), 2015-10-14
Supplement: 12934_2015_354_MOESM1_ESM.pdf [file 12934_2015_354_MOESM1_ESM.pdf]

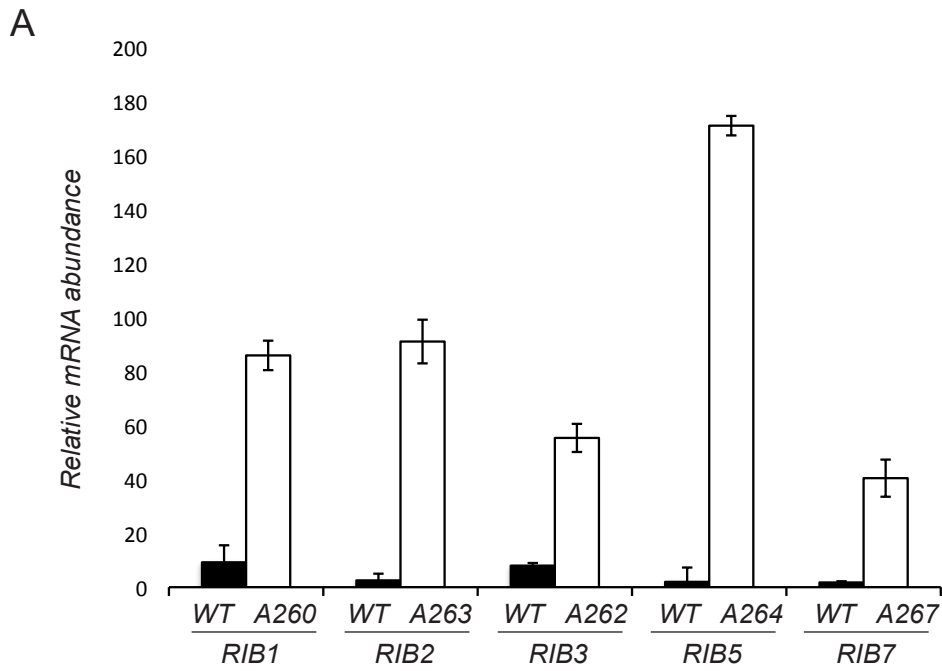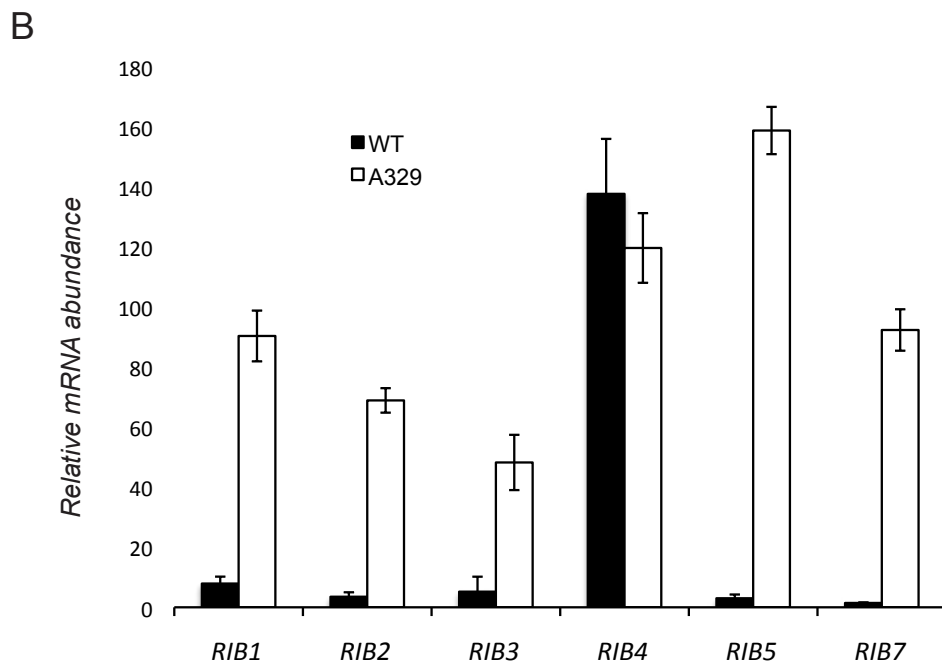

Additional File - Figure 1. Quantitative-real time PCR of *RIB* genes in *A. gossypii* mutants. A, relative transcription levels of the *RIB* genes in the strains containing overexpression modules for each *RIB* gene compared with the *WT* strain. B, relative transcription levels of the *RIB* genes both in the *WT* and the *A329* strains. Transcription levels were normalized using the *A. gossypii* *ACT1* gene as a reference. The results are means of two independent experiments performed in duplicate and are expressed as a ratio of the cDNA abundances of the target genes with respect to the *ACT1* mRNA levels.
