# Supplementary material for: Metabolic engineering of riboflavin production in Ashbya gossypii through pathway optimization
Source: PubMed Central journal article supplement (PMC4605130; doi:10.1186/s12934-015-0354-x), 2015-10-14
Supplement: 12934_2015_354_MOESM2_ESM.pdf [file 12934_2015_354_MOESM2_ESM.pdf]

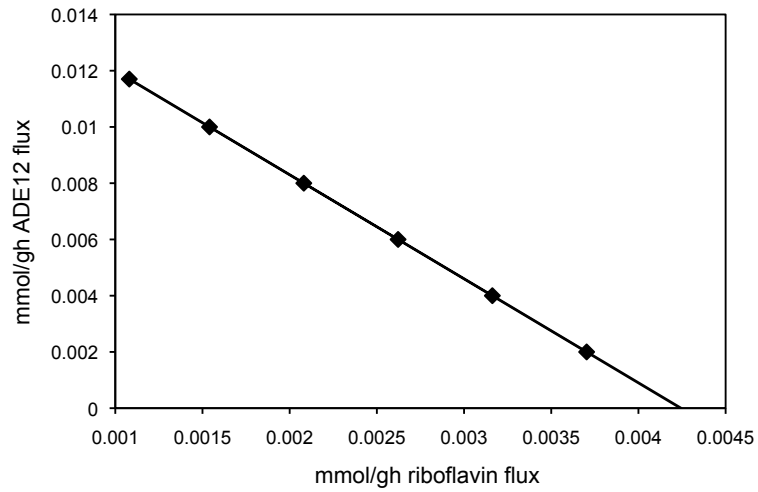

Additional File - Figure 2. Correlation between the ADE12-catalyzed flux and riboflavin production in *A. gossypii*. The *A. gossypii* iRL766 model was used to predict the effect of the ADE12 flux reduction over riboflavin biosynthesis. See Methods for details.

Additional File - Figure 2
